# Supplementary material for: SRFR1 Negatively Regulates Plant NB-LRR Resistance Protein Accumulation to Prevent Autoimmunity
Source: PLoS Pathog. 2010 Sep 16;6(9):e1001111. doi: 10.1371/journal.ppat.1001111 (PMC2940742; doi:10.1371/journal.ppat.1001111)
Supplement: Figure S3 — Alignment of SRFR1 and its homologs in rice, human and mouse. AtSRFR1, OsSRFR1, MmSRFR1, and HsSRFR1 represent NP_195462, NP_001058749, NP_663582, and NP_078801 respectively. The sequences were retrieved from NCBI and aligned by the ClustalX2. The aligned data were further analyzed by the BOXSHADE 3.21 (http://www.ch.embnet.org/software/BOX_form.html). (0.84 MB PDF) [file ppat.1001111.s003.pdf]

|         |     |                                                                |
|---------|-----|----------------------------------------------------------------|
| AtSRFR1 | 1   | MATATATSERFELAKHCSSRNWSKAIRVLDSSLAKE-SSILDICNRAFCYNQLELHKHVI   |
| OsSRFR1 | 1   | -----MGSERAEARVCGGRNWSKAIRILD AHLARSPSSIHDLCNRAFCYSQLELHKHV    |
| MmSRFR1 | 1   | -----MAPAGCGCGCS-----GSLGAAVVRP-----                           |
| HsSRFR1 | 1   | -----MAPAGCCCCCFWGGAAAGAARRVL-----                             |
|         |     |                                                                |
| AtSRFR1 | 60  | KDCDKALLLEPFATQAFILKGRALLALGRKQEAFLVLEQGYKSALQQTADV KQLLELEEL  |
| OsSRFR1 | 56  | KDCDRALELDPAIIQAYVLKGKALSALCKREEALAVWEOGHEVAVRDTMDLKQLLELEEL   |
| MmSRFR1 | 22  | -----LLLLLG-----ALAC-----ARATHYSPLSLLKQE                       |
| HsSRFR1 | 28  | -----LLLLLG-----VLSAGLRPGALATEHYSPLSLLKQE                      |
|         |     |                                                                |
| AtSRFR1 | 120 | LKDARREIDGILKSHATESPOETPAYHSEKSDKSDKLDNHESGASSNNSHESSELGE      |
| OsSRFR1 | 116 | VSSVK-----ICETIECEDRVVDASPCDTKVVISDRVVDTSCTATTMAD-----         |
| MmSRFR1 | 48  | LQHRQ-----QQEAPAGGG--CPQSGDWADQY-PEC-----                      |
| HsSRFR1 | 59  | LQHRQ-----QQEAPAGGGGCSPQSGDWGDQYSAECG-----                     |
|         |     |                                                                |
| AtSRFR1 | 180 | QSKIVSFSKVASKASKQSDGNSDLONGSVYKEKENGKCGSQINGVYESCKPCNGSDLHDN   |
| OsSRFR1 | 161 | -TKTVVCEENIGNSGVISNGAVILAND--NKADNNKECSSPTKDTTGTHHTPKKTKPK     |
| MmSRFR1 | 76  | -----ESSFLNFHESDCELRGSAPCDS                                    |
| HsSRFR1 | 91  | -----ESSFLNFHSDCEPKGSSPCDS                                     |
|         |     |                                                                |
| AtSRFR1 | 240 | LAESSDRFGELSGINGKISIKSSKMSHKAEARCGISDESRKNKKYTIARISGTHSISVDF   |
| OsSRFR1 | 218 | KSKAK---GRKEINSQIEDVADSISSETVAVDQTLFASKISK-----SSKSISLDF       |
| MmSRFR1 | 98  | LLSLN---TEKILSQAKSIAEQKRF-----FATDNDSTNE                       |
| HsSRFR1 | 113 | LLSLN---TEKILSQAKSIAEQKRF-----FATDNDSTNE                       |
|         |     |                                                                |
| AtSRFR1 | 300 | RLSRGIAQVNEGNVTKAISIFDKVLKEEPTYPEALIGRGTAYAFQ-----ELESATADF    |
| OsSRFR1 | 267 | RLSRGIAQVNEGRYDQAISIFDQILRETPTYPEALIGRGTAYAFQ-----ELDSAISDF    |
| MmSRFR1 | 131 | ELAIAYVLVGSGLYDEAIRHFSTMLQ-----                                |
| HsSRFR1 | 146 | ELAIAYVLVGSGLYDEAIRHFSTMLQEEFDLVSAIYGRGIAYGKGLHDIKNAELALFEL    |
|         |     |                                                                |
| AtSRFR1 | 355 | TKAIQSNPAASEAWKRRGQARAALGEVVEAVEDLTKALVFEPNSPDVLHERGIVNFKSKD   |
| OsSRFR1 | 322 | TKAIQSNPSAGEAWKRRGQARAALGEVVEAVEDLTKALVFEPNSPDILHERGIVNFKFKD   |
| MmSRFR1 | 157 | -----                                                          |
| HsSRFR1 | 206 | SRVITILEPDRPEVFEQRAEILSPLGRINEAVNDLTKATQLQP-SARLYRHRGTLTYFISED |
|         |     |                                                                |
| AtSRFR1 | 415 | FTAAVKDLSICLKQEKDNKSAYTYLGLAFASLGEYKKAEEAHLKSTQLDSNYLEAWLHLA   |
| OsSRFR1 | 382 | YNAAVEDLSTCVKROKKNSSAHTYLGLTLSALGEYKKAEEHLLGIKYDENFLDSWAHL     |
| MmSRFR1 | 157 | -----EATEAFKEALKQKQVDFIDAYKSLG                                 |
| HsSRFR1 | 265 | YATAHEDFQQSLELNKNQPIAMLYKGLTFEHRGLLKEATESFKEALKQKQVDFIDAYKSLG  |
|         |     |                                                                |
| AtSRFR1 | 475 | QFYQELADHCKALECEQVQLQVDNRVWKAYHLRGLVFHGLGEHRKATQELSIGLSIEN-T   |
| OsSRFR1 | 442 | QAYLDTGCEPEKMLNVEKVLQIDNVFGKAYHLRGILYHGMGRHRSATKDLSVALKHESN    |
| MmSRFR1 | 181 | QAYRELGNFDAATESFQKALLLNQNHVQTLQLRGMMLYHHGSLQEALKNFKRCLQLEPYN   |
| HsSRFR1 | 325 | QAYRELGNFEAATESFQKALLLNQNHVQTLQLRGMMLYHHGSLQEALKNFKRCLQLEPYN   |
|         |     |                                                                |
| AtSRFR1 | 534 | IECLYLRLGSCYHAGGEYRDAVKDYDATVDVELDAVEK FVLQCLAF-YQELALYTASKVS  |
| OsSRFR1 | 502 | IECLYLRLASCHHAIGEYKAAIKDYDDVLDLELDSMDK FVLQCLAF-YQELALYTASKAN  |
| MmSRFR1 | 241 | EVCQYMKGLSHVAMGQFYEGIKAQTKVMLNDPLPGQKASPEYLRVKYLR EYSRYLHAHLD  |
| HsSRFR1 | 385 | EVCQYMKGLSHVAMGQFYEGIKAQTKVMLNDPLPGQKASPEYLRVKYLR EYSRYLHAHLD  |
|         |     |                                                                |
| AtSRFR1 | 593 | SEFLCEDIDGDIIDPMFK EYWKRLHPKNVCEKVYRQPLRESLKKGK LKKDLAITKQKA   |
| OsSRFR1 | 561 | LEFSQENIDDDVDPLFKEYWKRLHPKNVAEKVYRQPLRISLRSGRLNKODFKFTKHQT     |
| MmSRFR1 | 301 | TPLTENIDSDLPGSFKDHWAKNLP---FLIDGYEEQPGIQPHIRDVLHQNFE GYKPEVQ   |
| HsSRFR1 | 445 | TPLTENIDVDLPGSFKDHWAKNLP---FLIEDYEEQPGIQPHIKDVLHQNFE SYKPEVQ   |
|         |     |                                                                |
| AtSRFR1 | 653 | NILRFADLIGKRIOYDCPGFLPNKROHRMAGLAVIETAKVSKAWRIEWRNSTKGTTKNG    |
| OsSRFR1 | 621 | TLILAADSIGKKIOYNCRGFLPNQRQYRMAGLAAIETAKVSKAWRFLRN-----PKNNA    |
| MmSRFR1 | 358 | ELICVADRLGSLMQYETPGFLPNKRIHRAMGLAALEVMOAVHRTW-----TN           |
| HsSRFR1 | 502 | ELICVADRLGSLMQYETPGFLPNKRIHRAMGLAALEVMOAVQRTW-----TN           |

|         |     |          |        |            |        |               |               |                   |                 |   |
|---------|-----|----------|--------|------------|--------|---------------|---------------|-------------------|-----------------|---|
| AtSRFR1 | 713 | KKNRRRE  | RTN    | ILSQNRGGAG | CSSSS  | FSET          | STGYASLEDRSS  | GRSILSWQDVYSPAVRW | RQ              |   |
| OsSRFR1 | 676 | KLVRRRD  | KLN-AC | QNRGGY-C   | STSTLS | SSPT-SSPNEDRI | SSGISLSWHDVYN | IAVKWR            | RQ              |   |
| MmSRFR1 | 405 | SKVRMNGK | TR     | -----      |        |               |               |                   | LLQWRDMEDIAVKWR | R |
| HsSRFR1 | 549 | SKVRMNGK | TR     | -----      |        |               |               |                   | LMQWRDMEDIAVKWR | R |

  

|         |     |          |         |               |                  |             |                   |         |         |
|---------|-----|----------|---------|---------------|------------------|-------------|-------------------|---------|---------|
| AtSRFR1 | 773 | ISEPCDPV | VWV     | NKLSEEFNS     | -GFGS            | HTPMVLGQAKV | RYFPNYERT         | LTAKSII | TKDKLSV |
| OsSRFR1 | 733 | ISEPCDPV | VWV     | WINKLSEEFNS   | -GFGS            | HTPMVLGQAKI | IRYYPYQSVLEAAKNIM | LDLK    | YV      |
| MmSRFR1 | 431 | IADPDQP  | PVLWLDQ | MPAPSLSRGFNNH | INLIRGQVINMRYLEY | FEKILHET    | TKDRILVYHGA       |         |         |
| HsSRFR1 | 575 | IADPDQP  | PVLWLDQ | MPAPSLSRGFNNH | INLIRGQVINMRYLEY | FEKILHET    | TKDRILVYHGA       |         |         |

  

|         |     |           |                                       |                           |                  |                |   |  |  |
|---------|-----|-----------|---------------------------------------|---------------------------|------------------|----------------|---|--|--|
| AtSRFR1 | 832 | RSKDK     | WIDLSKDEK                             | EKIMRAETCDELHN            | IVGED-FWVATWCD   | STGSEGRLEGTRIT | C |  |  |
| OsSRFR1 | 792 | NNAEDRAIF | LTDIEK                                | KKIEVASSCELYHIVGET-MWVSTR | CDSIAFOGRLEGTRIT | C              |   |  |  |
| MmSRFR1 | 491 | NNPKGLLE  | VREALEKVHKVEDLLPIMKQFNTTKTKDGETVNTKVP | SLKDQ                     | QKEYD            | GGFTITI        |   |  |  |
| HsSRFR1 | 635 | NNPKGLLE  | VREALEKVHKVEDLLPIMKQFNTTKTKDGETVNTKVP | SLKDQ                     | QKEYD            | GGFTITI        |   |  |  |

  

|         |     |         |                  |                       |                   |           |       |  |  |
|---------|-----|---------|------------------|-----------------------|-------------------|-----------|-------|--|--|
| AtSRFR1 | 891 | IQKPGRL | CYDFS            | IRTPCTPARWSD-DEEM     | TSAAEALCTAYCGENYG | STELDALET | VRDAI |  |  |
| OsSRFR1 | 850 | TQNMGKT | GDFFAIRTPCTPSRWE | EYDEEMSA              | AAEATCBAYCSDTNPT  | RPDMLDAV  | KAAI  |  |  |
| MmSRFR1 | 551 | TGDKVGN | -ILFSVETQTTEERTQ | LYHAEIDALYKDLT-AKGKVL | TLSAEFGEADAVCNLI  |           |       |  |  |
| HsSRFR1 | 695 | TGDKVGN | -ILFSVETQTTEERTQ | LYHAEIDALYKDLT-AKGKVL | ILSSEFGEADAVCNLI  |           |       |  |  |

  

|         |     |          |                 |                                        |                        |       |  |  |  |
|---------|-----|----------|-----------------|----------------------------------------|------------------------|-------|--|--|--|
| AtSRFR1 | 951 | LRMTYYWY | NFMPLARG        | LAVTG                                  | GFVVLGLLLAANMEFTETIPKG | ----- |  |  |  |
| OsSRFR1 | 910 | LRMTYYWY | NFMPLSRGSAVVG   | YVVLGLFLAANMDVTASIPHG                  | -----                  |       |  |  |  |
| MmSRFR1 | 609 | LSLVYYFY | NLMPLSRGSSVIAYS | SVIVGALMASGKEVAGKIPKGKVCWAGGGTGMAAPRPG | -----                  |       |  |  |  |
| HsSRFR1 | 753 | LSLVYYFY | NLMPLSRGSSVIAYS | SVIVGALMASGKEVAGKIPKG                  | -----                  |       |  |  |  |

  

|         |     |          |                     |     |                                |  |         |                                |    |
|---------|-----|----------|---------------------|-----|--------------------------------|--|---------|--------------------------------|----|
| AtSRFR1 | 994 | -----    |                     |     |                                |  | LQIDWEA | ILNVEPGSFVDSVKSWLYPSLKINT      | SW |
| OsSRFR1 | 953 | -----    |                     |     |                                |  | VQVDWEA | ILSQDPTFVDKIKFWLYPSIKTSRNL     |    |
| MmSRFR1 | 669 | LLAVDRMR | ARPHTISFLLSRPAPPLFQ | LVD | FEAMTAPGSEAFSKIAKSWMN-LKSISPSY |  |         |                                |    |
| HsSRFR1 | 796 | -----    |                     |     |                                |  | KLVD    | FEAMTAPGSEAFSKIAKSWMN-LKSISPSY |    |

  

|         |      |         |                     |           |       |  |  |  |  |
|---------|------|---------|---------------------|-----------|-------|--|--|--|--|
| AtSRFR1 | 1028 | RDHTE   | ISSAFSTTGAVVAAL     | STYND     | ----- |  |  |  |  |
| OsSRFR1 | 987  | KDYADVS | VAFSTTGSVVAAL       | TCVD      | ----- |  |  |  |  |
| MmSRFR1 | 728  | KTLP    | SVSETFPTLRSMIEVLNTD | STPRCLKKL |       |  |  |  |  |
| HsSRFR1 | 829  | KTLP    | SVSETFPTLRSMIEVLNTD | SSPRCLKKL |       |  |  |  |  |
