# Supplementary material for: SRFR1 Negatively Regulates Plant NB-LRR Resistance Protein Accumulation to Prevent Autoimmunity
Source: PLoS Pathog. 2010 Sep 16;6(9):e1001111. doi: 10.1371/journal.ppat.1001111 (PMC2940742; doi:10.1371/journal.ppat.1001111)
Supplement: Figure S6 — Yeast two-hybrid analysis of self-association of the TPR domain of SRFR1. (0.28 MB PDF) [file ppat.1001111.s006.pdf]

|                                                      |                                                                                     |                                                                                     |                                                                                     |
|------------------------------------------------------|-------------------------------------------------------------------------------------|-------------------------------------------------------------------------------------|-------------------------------------------------------------------------------------|
|                                                      | SD                                                                                  |                                                                                     |                                                                                     |
| Leu                                                  | -                                                                                   | -                                                                                   | -                                                                                   |
| Trp                                                  | -                                                                                   | -                                                                                   | -                                                                                   |
| His                                                  | +                                                                                   | -                                                                                   | -                                                                                   |
| 3mM 3AT                                              | -                                                                                   | -                                                                                   | +                                                                                   |
| BD+AD-SRFR1 <sub>1-567</sub>                         | 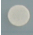   | 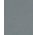   | 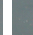   |
| BD-SRFR1 <sub>1-567</sub> +AD                        | 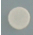   | 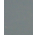   | 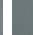   |
| BD-SRFR1 <sub>1-567</sub> +AD-SRFR1 <sub>1-567</sub> | 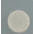   | 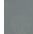   | 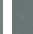   |
| BD-SRFR1 <sub>1-567</sub> +AD-SGT1b <sub>1-120</sub> | 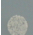 | 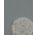 | 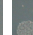 |
