# Supplementary material for: SRFR1 Negatively Regulates Plant NB-LRR Resistance Protein Accumulation to Prevent Autoimmunity
Source: PubMed Central journal article supplement (PMC2940742; doi:10.1371/journal.ppat.1001111), 2010-09-16
Supplement: ppat.1001111.s001.pdf [file ppat.1001111.s001.pdf]

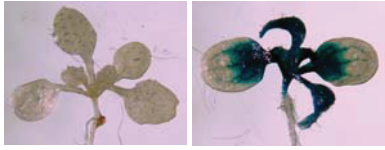

npr1-1

snr5-1 npr1-1
